# Supplementary material for: Nanoengineered mesenchymal stem cell therapy for pulmonary fibrosis in young and aged mice
Source: PubMed Central journal article supplement — Sci Adv. 2023 Jul 19;9(29):eadg5358. doi: 10.1126/sciadv.adg5358 (PMC10355834; doi:10.1126/sciadv.adg5358), 2023-07-19
Supplement: sciadv.adg5358_sm.pdf [file sciadv.adg5358_sm.pdf]

Supplementary Materials for  
**Nanoengineered mesenchymal stem cell therapy for pulmonary fibrosis in  
young and aged mice**

Meng-Meng Han *et al.*

Corresponding author: Hu-Lin Jiang, [jianghulin3@gmail.com](mailto:jianghulin3@gmail.com)

[jianghulin3@163.com](mailto:jianghulin3@163.com)

*Sci. Adv.* **9**, eadg5358 (2023)  
DOI: 10.1126/sciadv.adg5358

**This PDF file includes:**

Figs. S1 to S29  
Tables S1 to S4

## Supplementary Figures

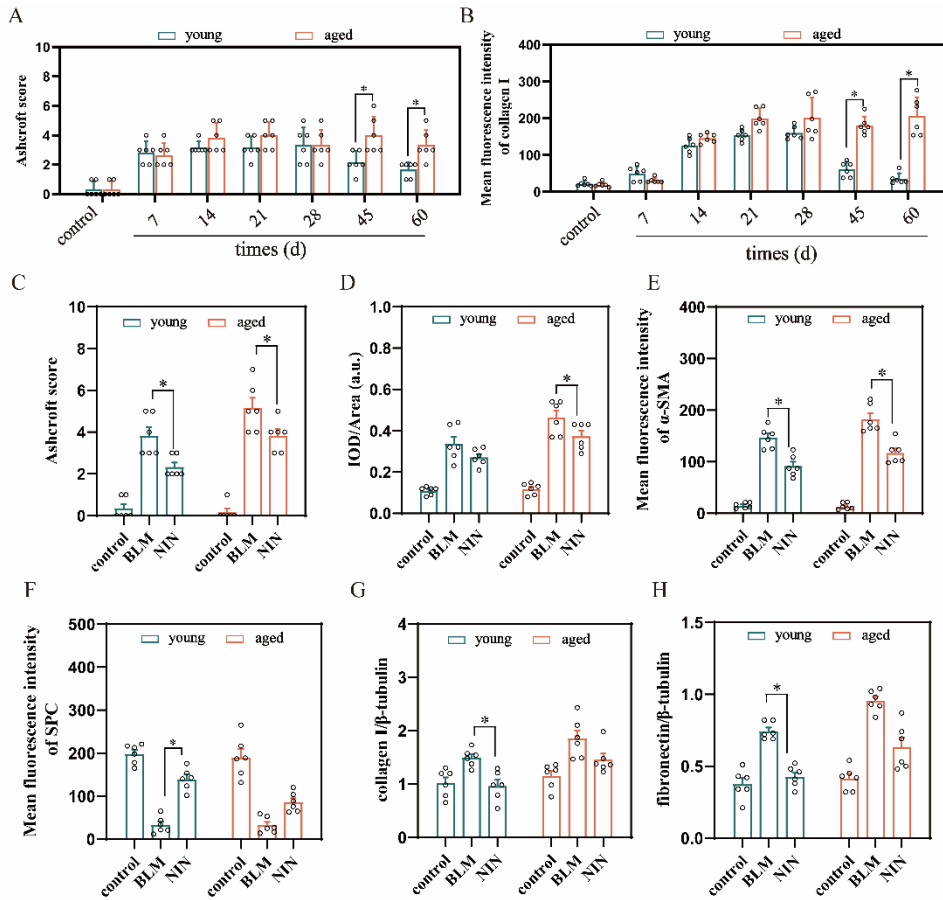

**Fig. S1. PF progression in young and aged mice.** Ashcroft score (A) and quantitative results of IF of collagen I (B) on young and aged mice challenged with BLM for different times. Ashcroft score (C) and integrated optical density (IOD) per area of Masson staining (D) of the lungs of young and aged mice treated with NIN. Mean fluorescence intensity of  $\alpha$ -SMA (E) and SPC (F). WB quantitative analysis of collagen I (G) and fibronectin (H). Data are mean  $\pm$  SD. \* $P < 0.05$ .

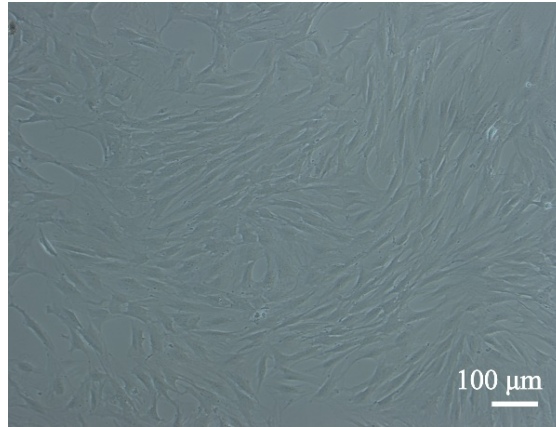

**Fig. S2. The morphologies of MSCs.** The morphology of the MSCs was fusiform.

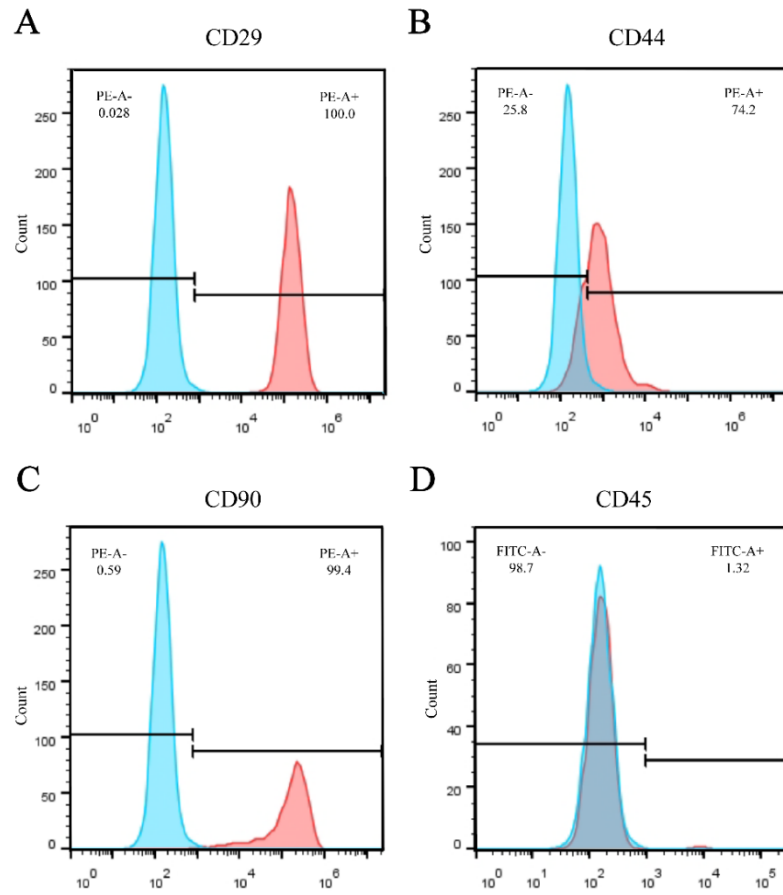

**Fig. S3. The identification of MSCs surface markers. (A) CD29. (B) CD44. (C) CD90. (D) CD45.**

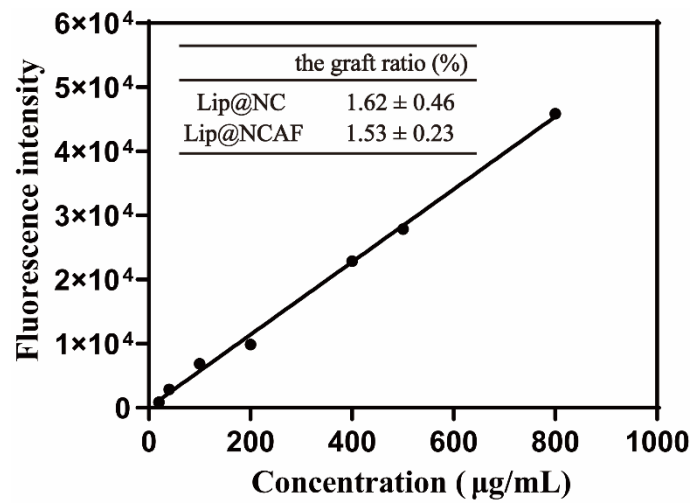

**Fig. S4.** The quantification of type I collagenase attached on Lip@NC and Lip@NCAF. Type I collagenase quantification. Standard curve of FITC in the supernatant (Ex: 485 nm, Em: 530 nm) (n=5). Data are means  $\pm$  S.D.

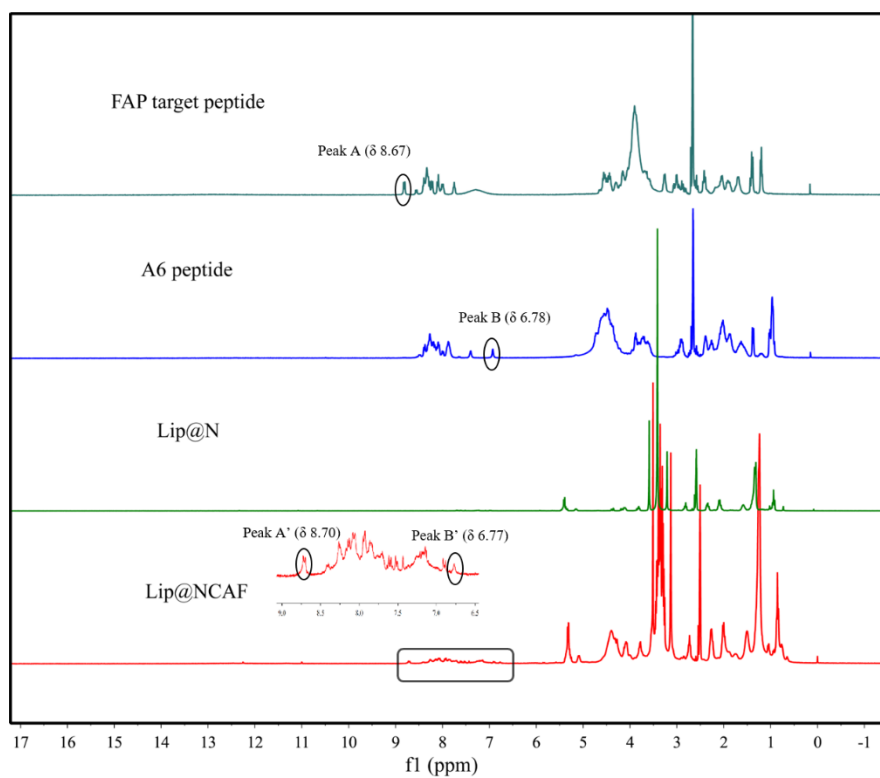

**Fig. S5. The characterization of Lip@NCAF.** <sup>1</sup>H-NMR spectra of FAP target peptide, A6 peptide, Lip@N and Lip@NCAF, respectively.

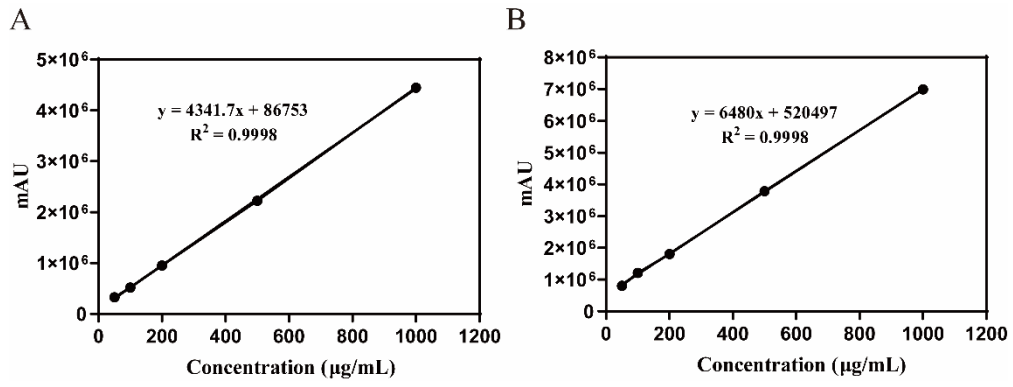

**Fig. S6. The graft ratios of A6 peptide and FAP target peptide. Standard curve of A6 peptide (A) and FAP target peptide (B).**

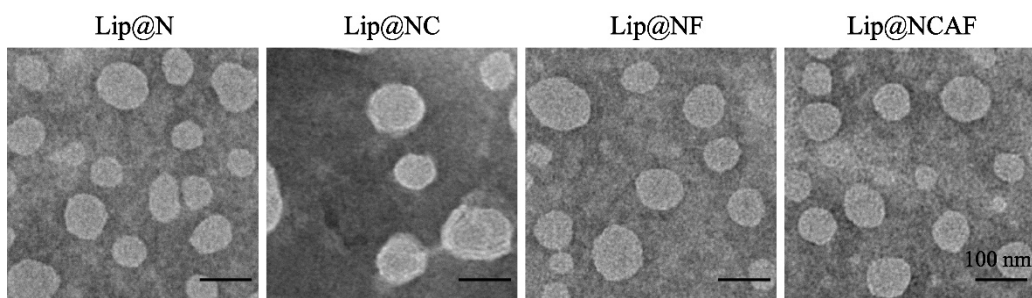

**Fig. S7. The micromorphology of different formulations.** TEM photographs of Lip@N, Lip@NC, Lip@NF and Lip@NCAF, respectively.



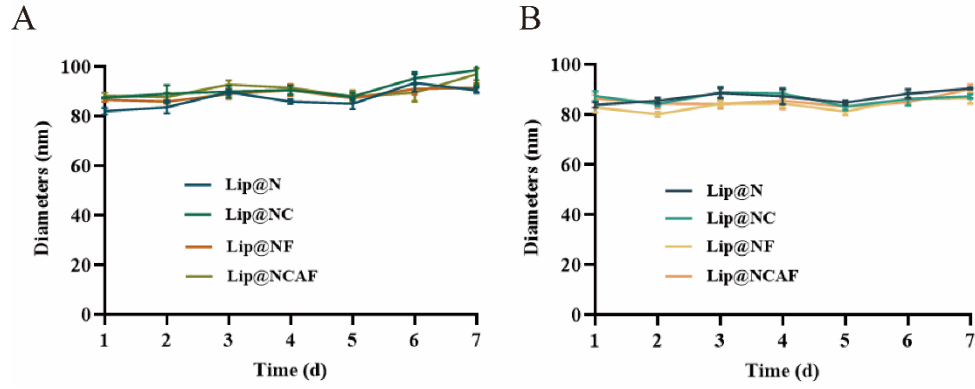

**Fig. S8. The stability of different formulations.** The particle size changes of Lip@N, Lip@NC, Lip@NF and Lip@NCAF in PBS (A) and DMEM containing 10% FBS (B) (n=5). Data are mean  $\pm$  S.D.

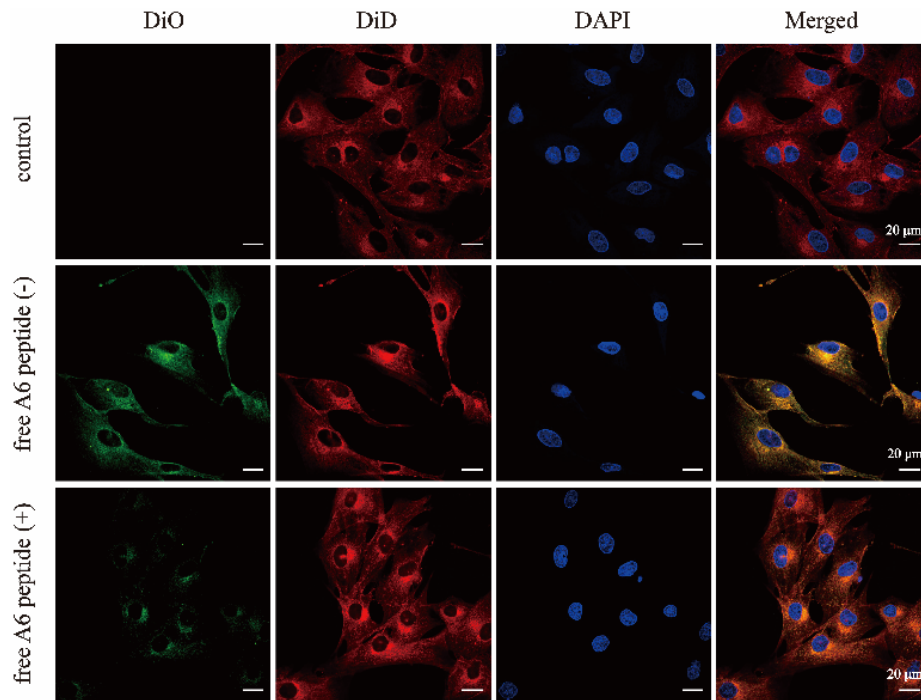

**Fig. S9. The combination mechanism of MSCs and Lip@NCAF.** CLSM images of DiD-labeled MSCs incubated with DiO-labeled Lip@CAF in the presence or absence of free A6 peptide preincubation.

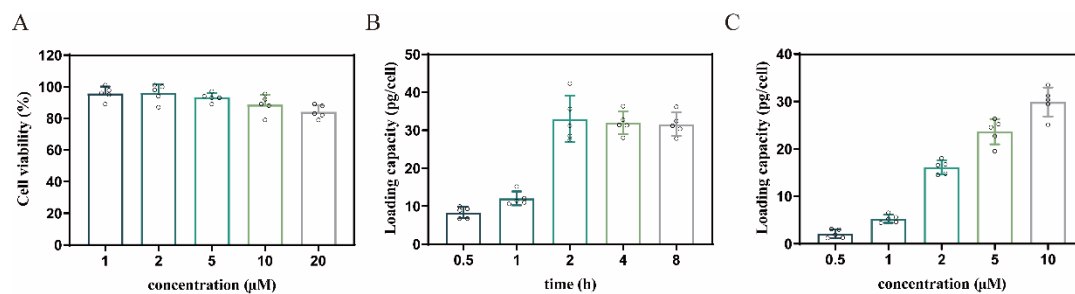

**Fig. S10. The cell viability and loading capacity of MSCs.** Cell viability of MSCs (A) treated with different concentrations of Lip@NCAF. The loading capacity of MSCs incubated with Lip@NCAF for different times (B) and at different concentrations (C) (n=5). Data are mean  $\pm$  S.D.

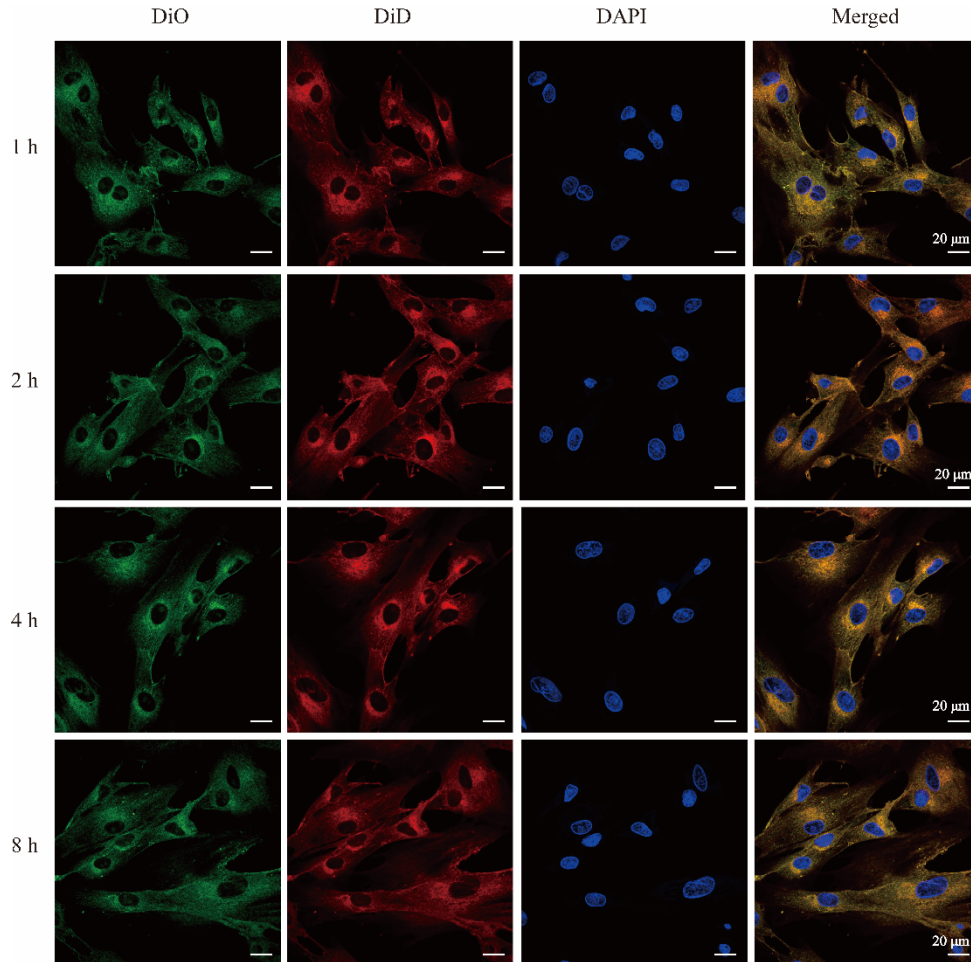

**Fig. S11.** The time-dependent combination of MSCs and Lip@NCAF. CLSM images of DiD-labeled MSCs incubated with DiO-labeled Lip@CAF for 1 h, 2 h, 4 h and 8 h, respectively.

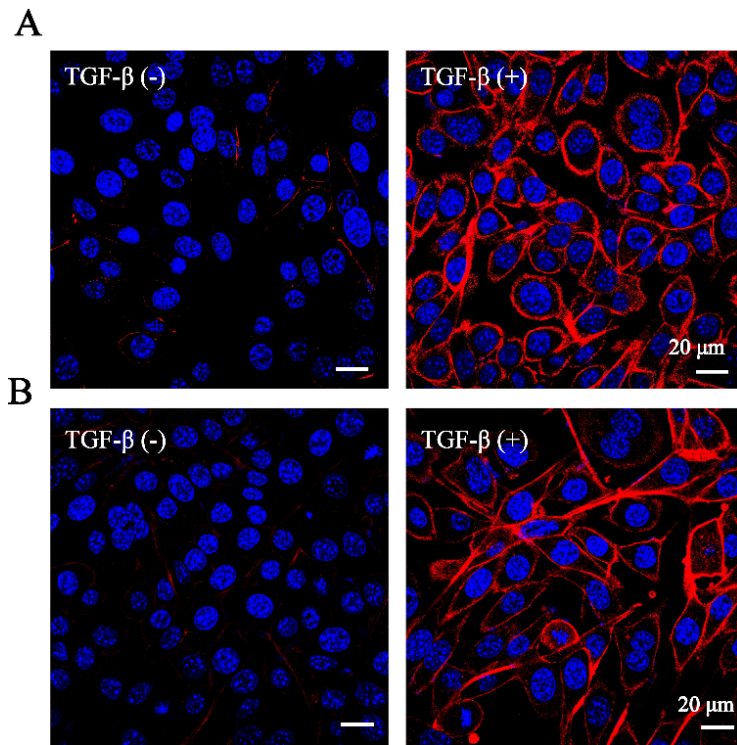

**Fig. S12. The identification of fibroblasts from young and aged mice. IF staining of  $\alpha$ -SMA of y-fibroblasts (A) and a-fibroblasts (B) treated with TGF- $\beta$ .**

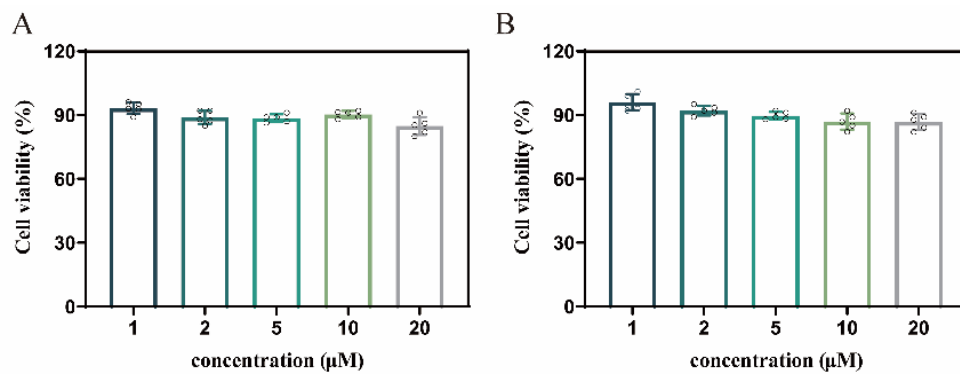

**Fig. S13. The viability of fibroblasts after incubation with Lip@NCAF.** Cell viability of  $\gamma$ -fibroblasts (A) and  $\alpha$ -fibroblasts (B) treated with different concentrations of Lip@NCAF (n=5). Data are mean  $\pm$  S.D.

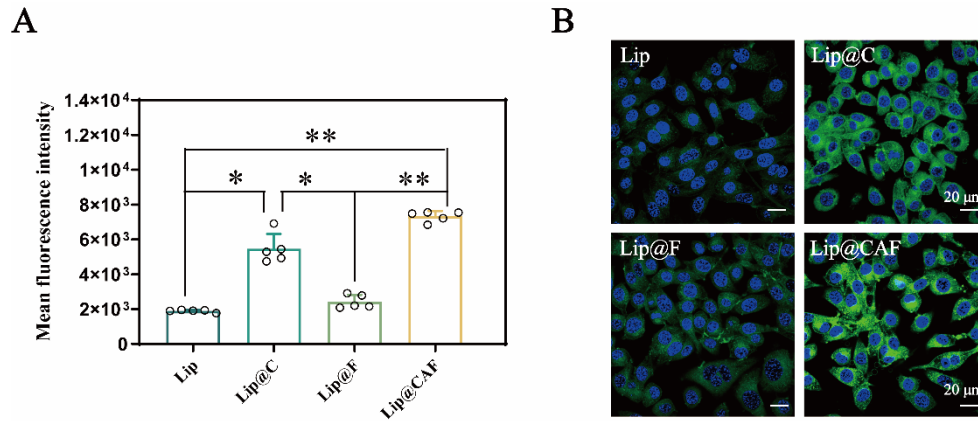

**Fig. S14. The uptake of Lip@NCAF by a-fibroblasts.** (A) The fluorescence intensity of a-fibroblasts was measured by FCM after adding different coumarin 6-labeled formulations to the Transwell chambers. (B) Cellular uptake in a-fibroblasts, as shown by CLSM. (n = 5). Data are mean  $\pm$  S.D. \* $P < 0.05$  and \*\* $P < 0.01$ .

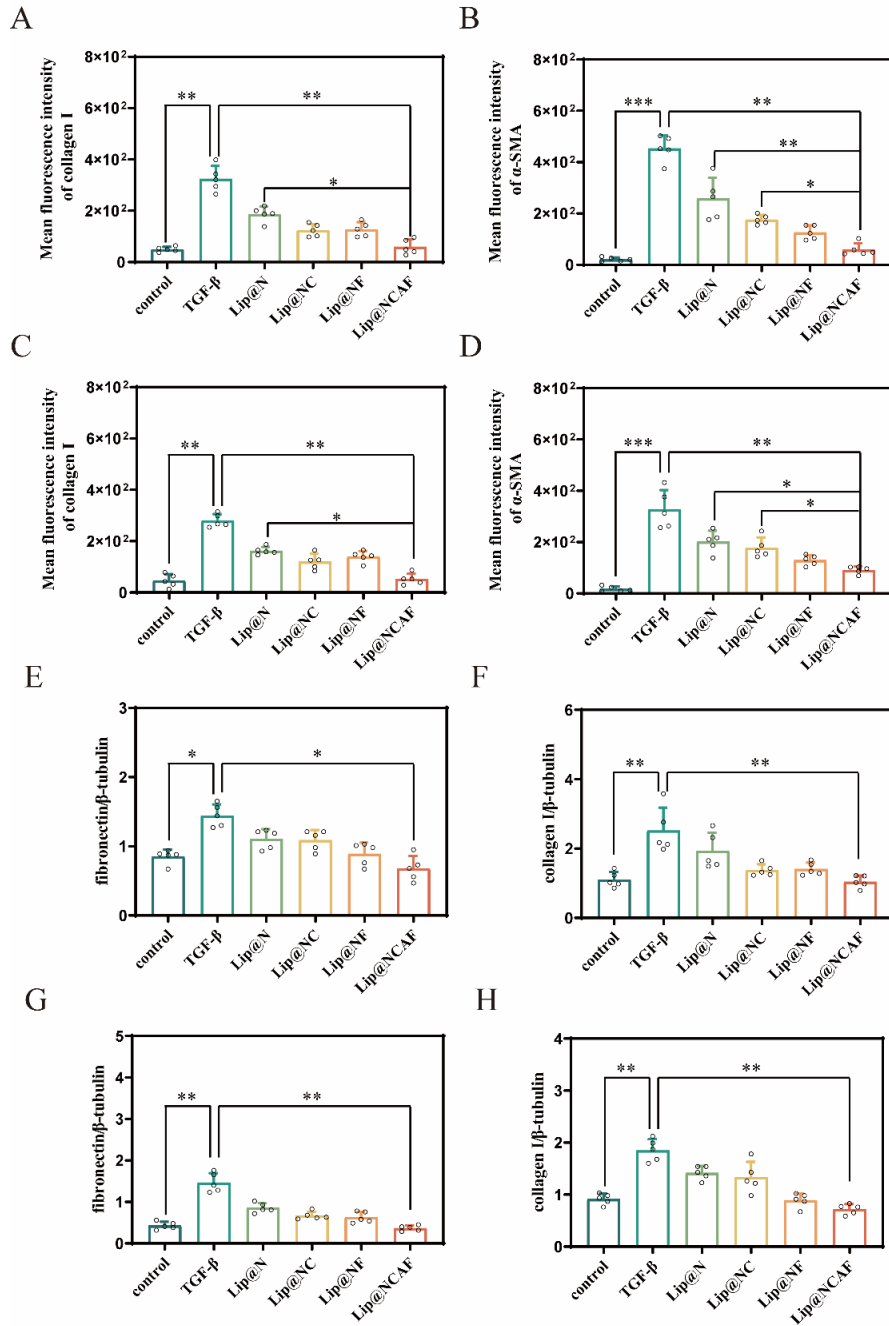

**Fig. S15. The antifibrotic effects of MSCs-Lip@NCAF in vitro.** Quantitative results of IF staining of collagen I and  $\alpha$ -SMA in y-fibroblasts (A and B) and a-fibroblasts (C and D). Quantitative results of WB of fibronectin and collagen I in y-fibroblasts (E and F) and a-fibroblasts (G and H). (n = 5). Data are mean  $\pm$  S.D. \* $P$  < 0.05, \*\* $P$  < 0.01 and \*\*\* $P$  < 0.001.



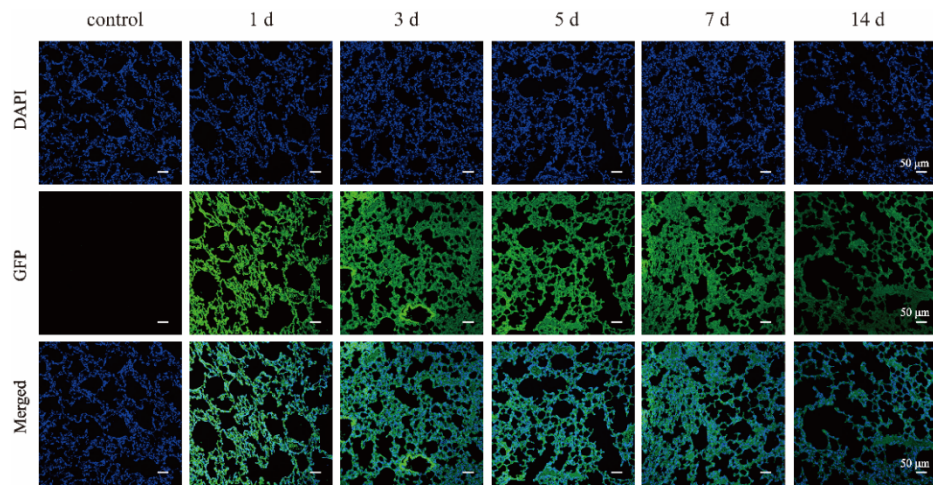

**Fig. S16. Lung-targeting ability of MSCs-Lip@NCAF in vivo.** CLSM images of lung sections after the mice were injected with MSCs stably expressing GFP.

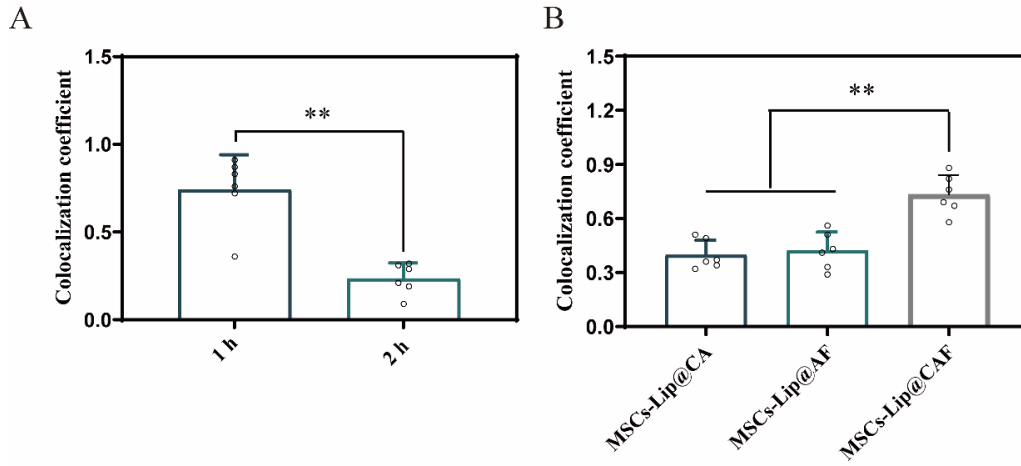

**Fig. S17. Behavior of MSCs-Lip@NCAF in vivo.** (A) Colocalization coefficient of DiI-labeled MSCs and DiO-labeled Lip@CAF after injection for 1 h and 2 h. (B) Colocalization coefficient of DiO-labeled Lip@CAF and FAP-positive fibroblasts after 4 h post injection. (n = 6). Data are mean ± S.D. \*\* $P < 0.01$ .

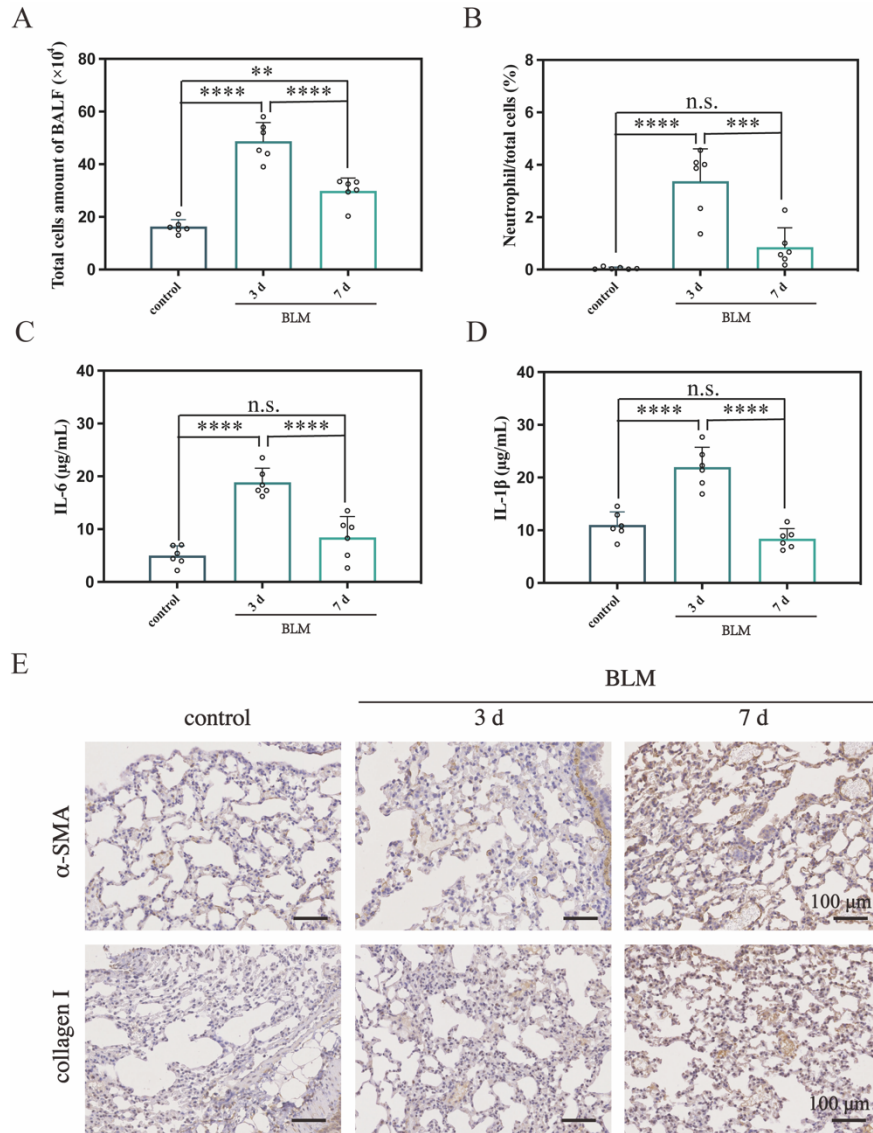

**Fig. S18. Inflammation and fibrosis progression after BLM instillation.** Total cells amount of bronchoalveolar lavage fluid (BALF) (A), the proportion of neutrophils (B), the levels of IL-6 (C) and IL-1 $\beta$  (D) after the young mice were treated with BLM for 3 days and 7 days. (E) The expressions of  $\alpha$ -SMA and collagen I (n=6). Data are mean  $\pm$  S.D. \*\* $P < 0.01$ , \*\*\* $P < 0.001$ , \*\*\*\* $P < 0.0001$  and n.s. no significant difference.

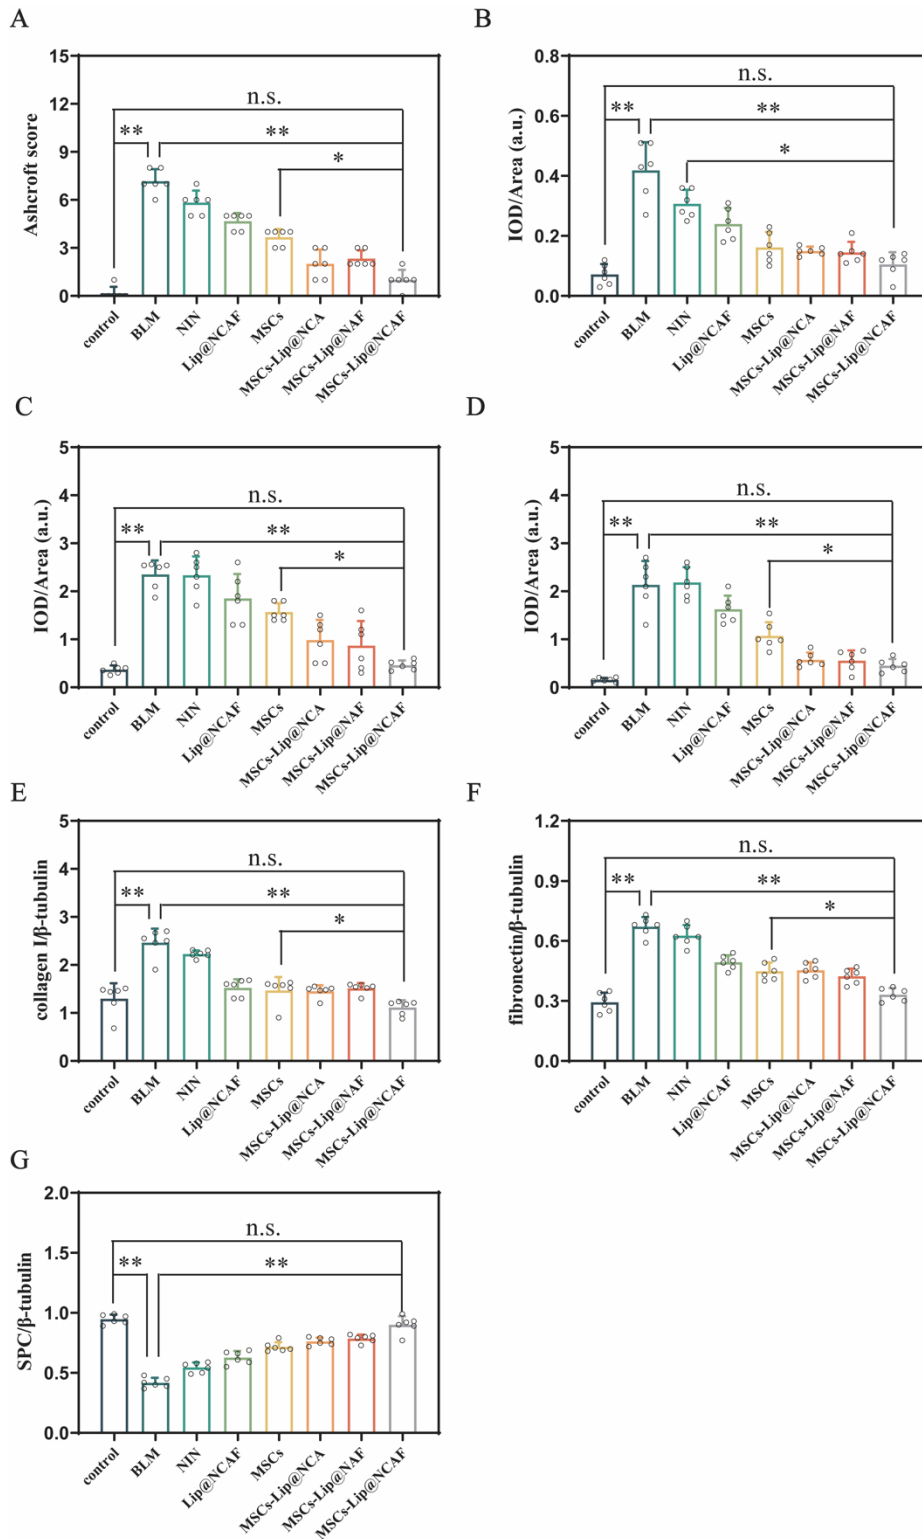

**Fig. S19. Antifibrotic effects of MSCs-Lip@NCAF on young mice.** Ashcroft score (A), IOD/area of Masson staining (B), collagen I (C) and  $\alpha$ -SMA (D) of young mice treated with different formulations. WB quantitative analysis of collagen I (E), fibronectin (F) and SPC (G). (n=6). Data are mean  $\pm$  SD. \* $P < 0.05$ , \*\* $P < 0.01$  and n.s. no significant difference.

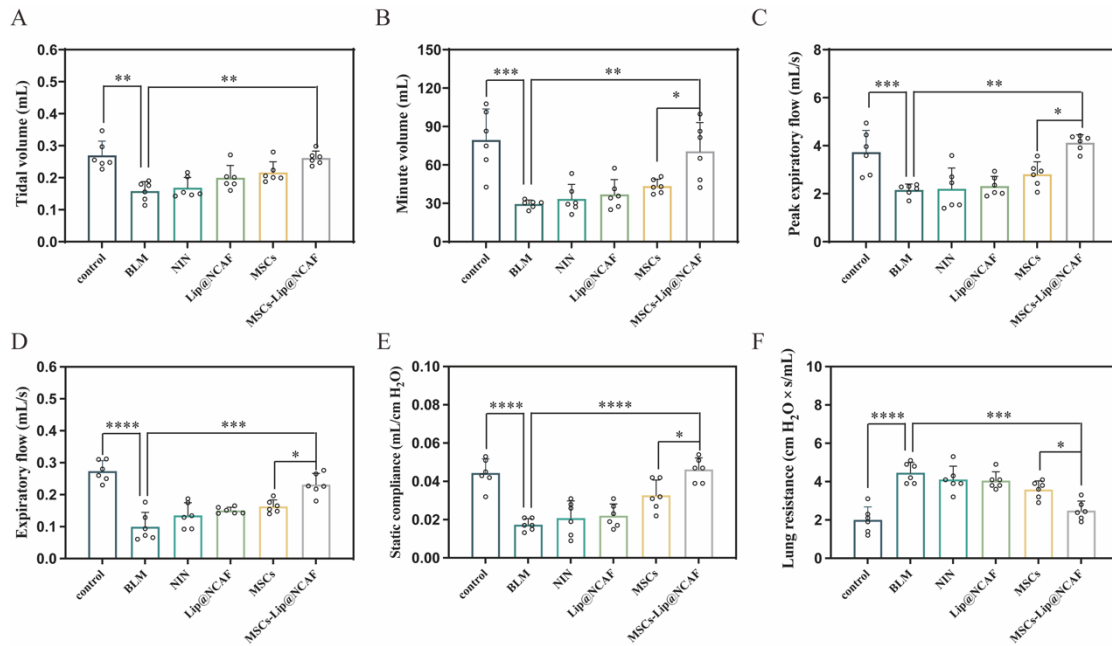

**Fig. S20. Lung functional test of the young mice treated with different formulations.** Tidal volume (A), minute volume (B), peak expiratory flow (C), expiratory flow 50 (D), static compliance (E) and lung resistance (F) of the young mice treated with NIN, Lip@NCAF, MSCs and MSCs-Lip@NCAF. (n=6). Data are mean  $\pm$  S.D. \* $P < 0.05$ , \*\* $P < 0.01$ , \*\*\* $P < 0.001$  and \*\*\*\* $P < 0.0001$ .

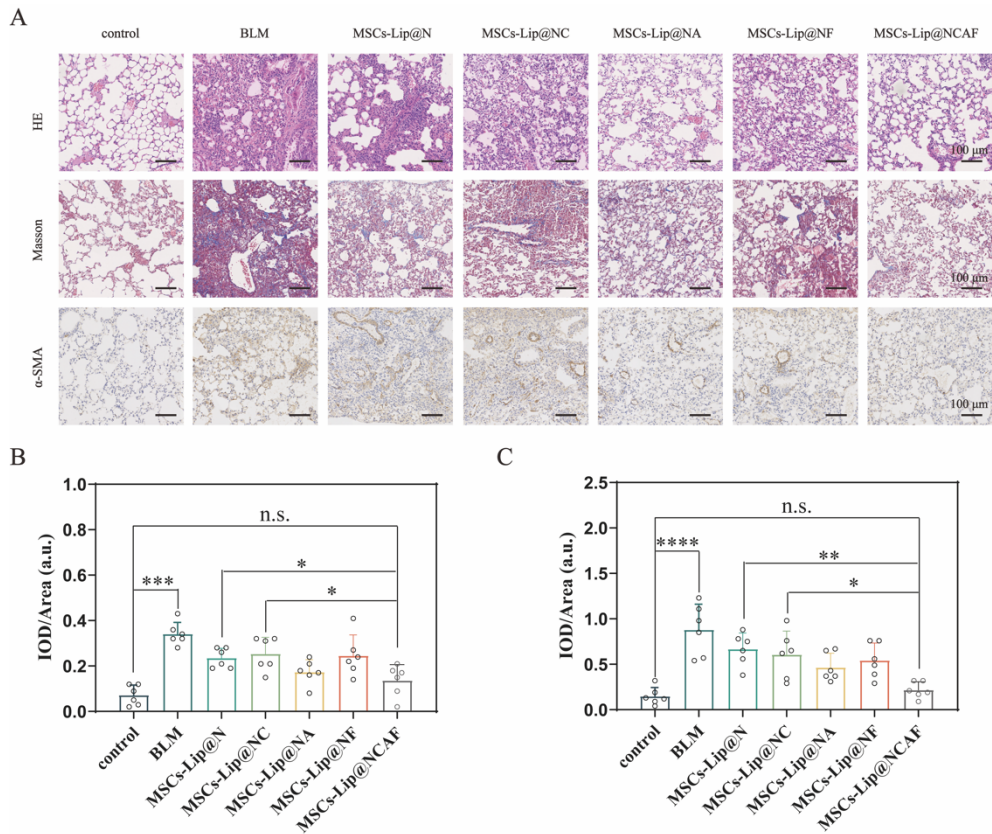

**Fig. S21. The antifibrotic effects of type I collagenase, A6 peptide and FAP target peptide.** (A) HE staining, Masson staining and IHC staining of lung sections from young mice treated with different formulations. Quantitative results of Masson staining (B) and  $\alpha$ -SMA (C). (n=6). Data are mean  $\pm$  S.D. \* $P < 0.05$ , \*\* $P < 0.01$ , \*\*\* $P < 0.001$ , \*\*\*\* $P < 0.0001$  and n.s. no significant difference.

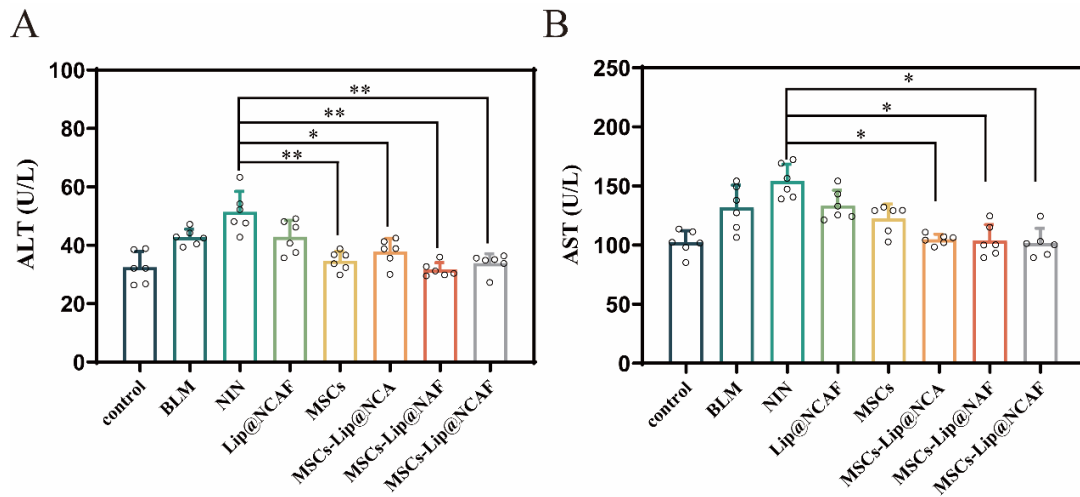

**Fig. S22. The levels of ALT and AST of young mice after treated with different formulations.** Serum ALT (A) and AST (B) levels of PF in young mice treated with different formulations for 3 weeks (n=6). Data are mean  $\pm$  S.D. \* $P < 0.05$  and \*\* $P < 0.01$ .

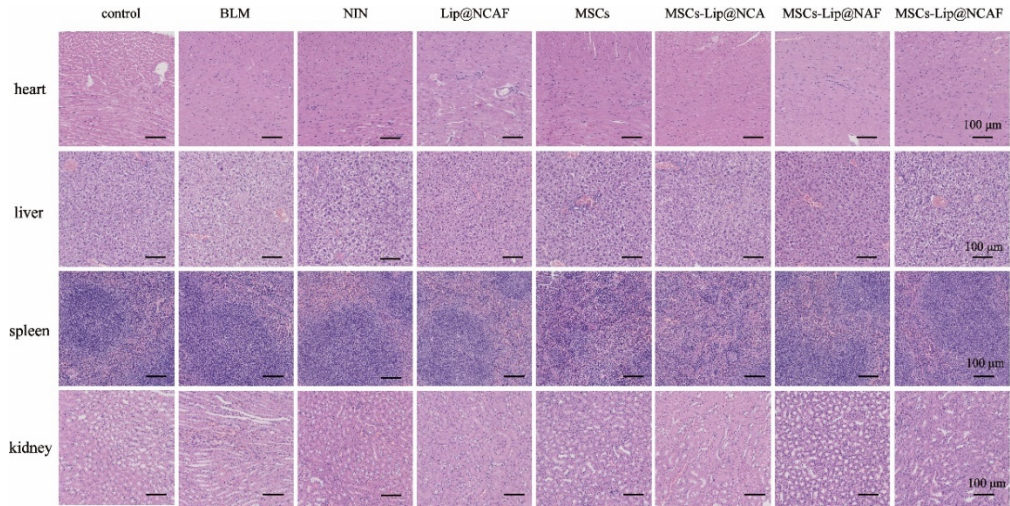

**Fig. S23. Systemic toxicity after treated with different formulations.** H&E staining of heart, liver, spleen and kidney of PF in young mice treated with different formulations for 3 weeks.



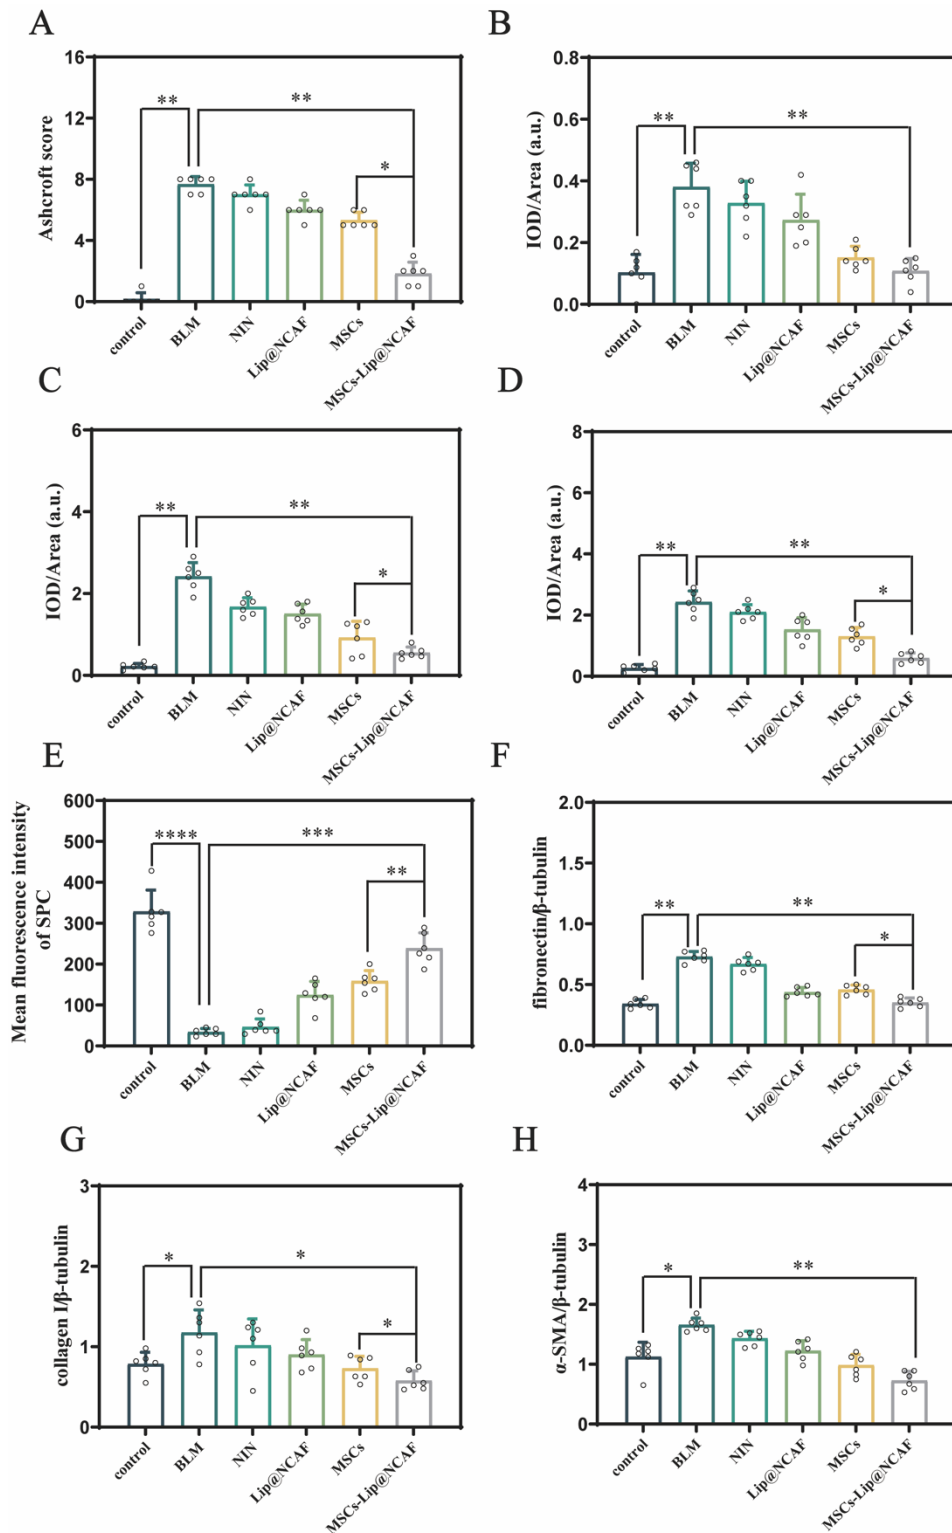

**Fig. S24. Antifibrotic effects of MSCs-Lip@NCAF on aged mice.** Ashcroft score (A), IOD/area of Masson staining (B), collagen I (C) and  $\alpha$ -SMA (D), mean fluorescence intensity of SPC (E) of the lungs of aged mice treated with different formulations. WB quantitative analysis of fibronectin (F), collagen I (G) and  $\alpha$ -SMA (H). (n=6). Data are mean  $\pm$  SD. \* $P$  < 0.05, \*\* $P$  < 0.01, \*\*\* $P$  < 0.001 and \*\*\*\* $P$  < 0.0001.

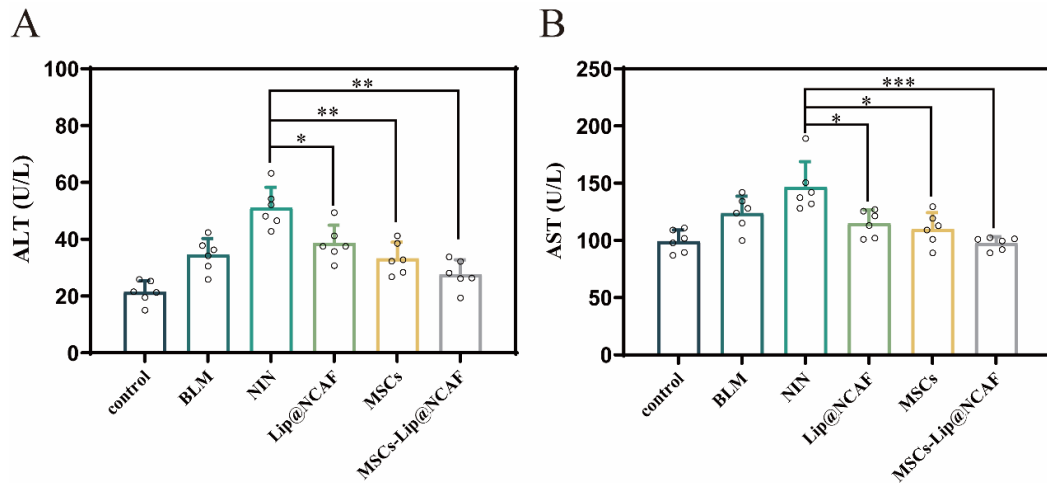

**Fig. S25. The levels of ALT and AST of aged mice after treated with different formulations.** Serum ALT (**A**) and AST (**B**) levels of PF in aged mice treated with different formulations for 3 weeks (n=6). Data are mean  $\pm$  S.D. \* $P < 0.05$ , \*\* $P < 0.01$  and \*\*\* $P < 0.001$ .

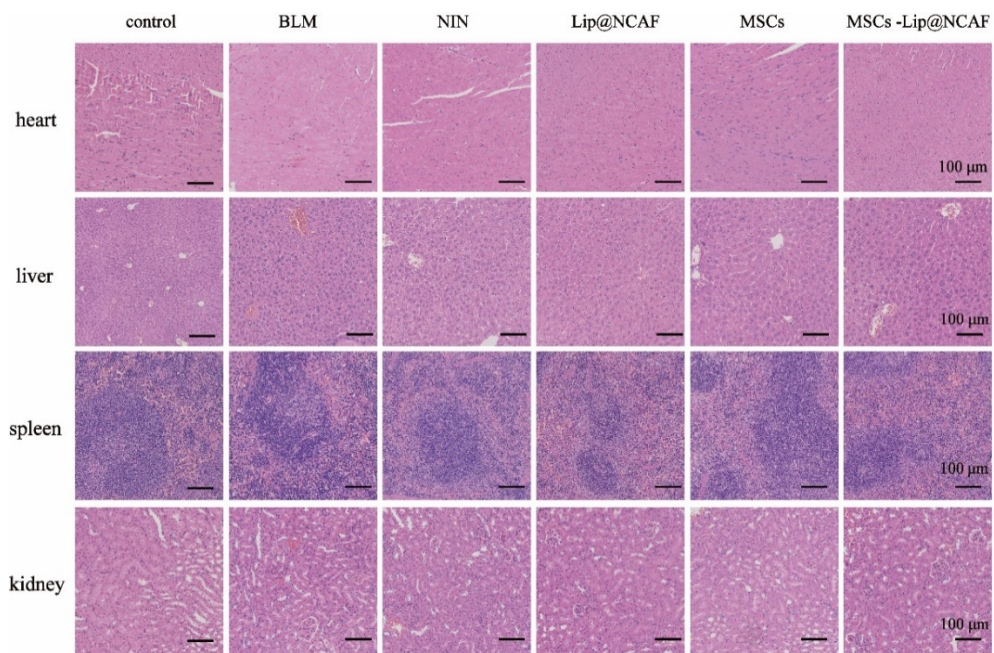

**Fig. S26. Systemic toxicity after treated with different formulations.** H&E staining of heart, liver, spleen and kidney of PF in aged mice treated with different formulations for 3 weeks.

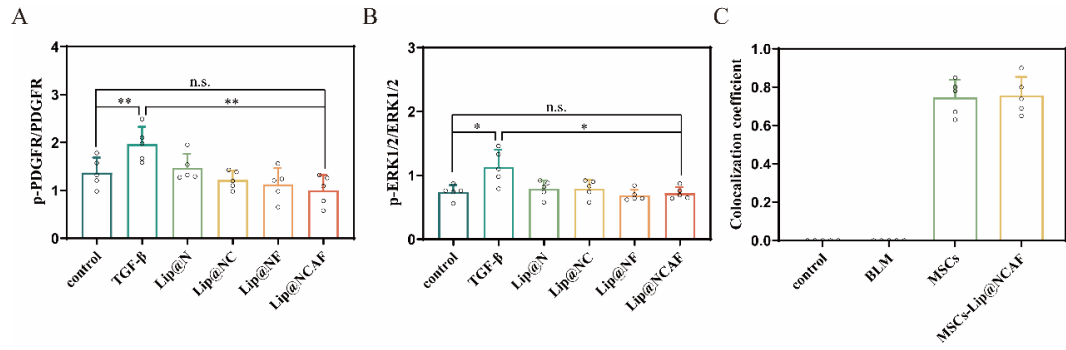

**Fig. S27.** Antifibrotic mechanisms of MSCs-Lip@NCAF. WB quantitative analysis of p-PDGFR (**A**) and p-ERK1/2 (**B**). (**C**) Colocalization coefficient of MSCs expressing GFP and SPC-positive AEC IIs. (n=6). Data are mean  $\pm$  S.D. \* $P < 0.05$ , \*\* $P < 0.01$  and n.s. no significant difference.

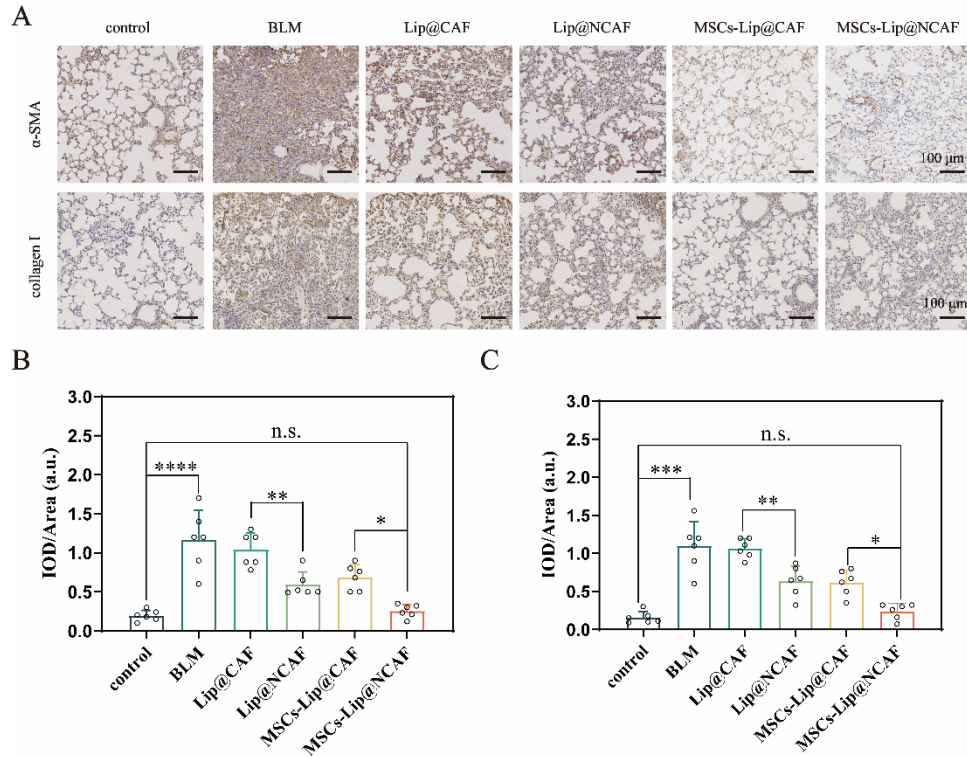

**Fig. S28. The antifibrotic effects of NIN.** (A) IHC staining of lung sections from young mice treated with different formulations. Quantitative results of  $\alpha$ -SMA (B) and collagen I (C). (n=6). Data are means  $\pm$  SD. \* $P < 0.05$ , \*\* $P < 0.01$ , \*\*\* $P < 0.001$ , \*\*\*\* $P < 0.0001$  and n.s. no significant difference.

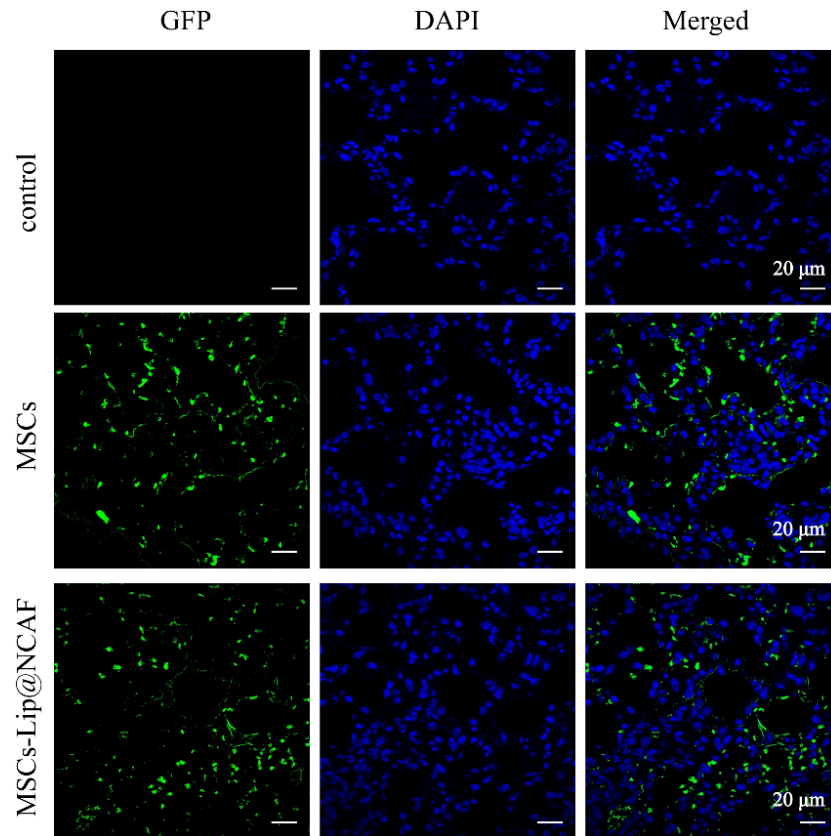

**Fig. S29. The differentiation of MSCs into AEC IIs.** CLSM images of lung sections from the aged mice with PF treated with MSCs and MSCs-Lip@NCAF transfected with a cell-specific expressed plasmid containing SPC promoter.

## Supplementary Tables

**Tab. S1. The characterization of different formulations.** Size, zeta potential, EE and LC of Lip@N, Lip@NC, Lip@NF and Lip@NCAF, respectively (n=5). Data are mean  $\pm$  S.D.

| Formulations | Size (nm)        | Zeta potential (mV) | EE (%)           | LC (%)          |
|--------------|------------------|---------------------|------------------|-----------------|
| Lip@N        | 82.42 $\pm$ 0.25 | -2.34 $\pm$ 0.36    | 94.25 $\pm$ 1.26 | 2.23 $\pm$ 0.26 |
| Lip@NC       | 85.52 $\pm$ 0.86 | -2.83 $\pm$ 0.16    | 96.18 $\pm$ 0.47 | 2.41 $\pm$ 1.27 |
| Lip@NF       | 84.47 $\pm$ 1.23 | -3.38 $\pm$ 0.83    | 93.69 $\pm$ 1.42 | 2.51 $\pm$ 1.49 |
| Lip@NCAF     | 89.25 $\pm$ 0.43 | -2.76 $\pm$ 0.28    | 93.48 $\pm$ 0.28 | 2.25 $\pm$ 0.68 |

**Tab. S2. Primer sequences of qPCR.** The forward primers and reverse primers of *Colla1*, *Sftpc*, *Fn1*, *Acta2*, *Pdgfrb*, *Cdkn2a*, *Cdkn1a*, *Mmp12*, *Mcp1*, *Gapdh*.

| primer sequence | forward primer          | reverse primer          |
|-----------------|-------------------------|-------------------------|
| <i>Colla1</i>   | CCTCAGGGTATTGCTGGACAAC  | CAGAAGGACCTTGTGGCCAGG   |
| <i>Sftpc</i>    | CATCGTTGTGTATGACTACCA   | CCTGGAAGTTCTGGAGTTTTCT  |
| <i>Fn1</i>      | CCCTATCTCTGATACCGTTGTCC | TGCCGCAACTACTGTGATTCCGG |
| <i>Acta2</i>    | TGCTGACAGAGGCACCACTGAA  | CAGTTGTACGTCCAGAGGCATAG |
| <i>Pdgfrb</i>   | GTGGAGATTTCGCAGGAGGTC   | ACCGTCAGAGCTCACAGACT    |
| <i>Cdkn2a</i>   | CGGGGACATCAAGACATCGT    | GCCGGATTTAGCTCTGCTCT    |
| <i>Cdkn1a</i>   | ACATCTCAGGGCCGAAAACG    | AAGACACACAGAGTGAGGGC    |
| <i>Mmp12</i>    | GCTCCTGCCTCACATCATAAC   | GGCTTCTCTGCATCTGTGAA    |
| <i>Mcp1</i>     | AACTACAGCTTCTTTGGGACA   | CATCCACGTGTTGGCTCA      |
| <i>Gapdh</i>    | ATGGTGAAGGTCGGTGTGAAC   | GCCGTGAGTGGAGTCATACTG   |



**Tab. S3.** The primary antibodies and secondary antibodies are as follow.

| Product                            | Supplier    | Catalogue number | Dilution |
|------------------------------------|-------------|------------------|----------|
| <b>Primary antibody:</b>           |             |                  |          |
| WB:                                |             |                  |          |
| rabbit anti-collagen I             | proteintech | 14695-1-AP       | 1: 2000  |
| rabbit anti-fibronectin            | abcam       | ab2413           | 1: 1000  |
| rabbit anti- $\alpha$ -SMA         | abcam       | ab5694           | 1: 2000  |
| rabbit anti-SPC                    | abcam       | ab270521         | 1: 1000  |
| rabbit anti-p-PDGFR                | ImmunoWay   | YP0441           | 1: 1000  |
| rabbit anti-PDGFR                  | abcam       | ab203491         | 1: 1000  |
| rabbit anti-p-ERK1/2               | abcam       | ab76299          | 1: 8000  |
| rabbit anti-ERK1/2                 | abcam       | ab184699         | 1: 10000 |
| rabbit anti- $\beta$ -tubulin      | Beyotime    | AF1216           | 1: 1000  |
| IF:                                |             |                  |          |
| rabbit anti-collagen I             | proteintech | 14695-1-AP       | 1: 200   |
| mouse anti- $\alpha$ -SMA          | proteintech | 67735-1-Ig       | 1: 500   |
| rabbit anti-SPC                    | abcam       | ab270521         | 1: 100   |
| rabbit anti-FAP                    | abcam       | ab218164         | 1: 200   |
| rabbit anti-Vimentin               | abcam       | ab92547          | 1: 400   |
| IHC:                               |             |                  |          |
| rabbit anti-collagen I             | proteintech | 14695-1-AP       | 1: 1000  |
| mouse anti- $\alpha$ -SMA          | proteintech | 67735-1-Ig       | 1: 5000  |
| <b>Secondary antibody:</b>         |             |                  |          |
| goat anti-rabbit IgG HRP-linked Ab | Beyotime    | A0208            | 1:1000   |
| goat anti-rabbit IgG Alexa 647     | Beyotime    | A0468            | 1: 500   |

**Tab. S4.** Assay kits used are as follow.

| Assay kit                          | Catalogue number | Supplier          |
|------------------------------------|------------------|-------------------|
| Whole cell lysis assay kit         | KGP2100          | KeyGEN BioTECH    |
| BCA protein quantitation assay kit | KGP902           | KeyGEN BioTECH    |
| Hydroxyproline assay kit           | A030-2-1         | Nanjing Jiancheng |
| Total RNA isolation kit            | RE-03011         | FOREGENE          |
| All-In-One 5X RT MasterMix         | G592             | abm               |
| BlasTaq™ 2X qPCR MasterMix         | G891             | abm               |
| EdU assay kit                      | C0071S           | Beyotime          |
| TNF- $\alpha$ assay kit            | 88-7324          | ThermoFisher      |
| IL-1 $\beta$ assay kit             | 88-7013          | ThermoFisher      |
| IL-6 assay kit                     | 88-7064          | ThermoFisher      |
| ALT assay kit                      | S03030           | Rayto             |
| AST assay kit                      | S03040           | Rayto             |
